# Supplementary material
Source: PubMed Central journal article supplement (PMC7529702)
Supplement: NIHMS1591995-supplement-1.pdf [file NIHMS1591995-supplement-1.pdf]

## Supplementary Figure 1.

Proportion of cancer cells which are intraductal. Data are presented as scatter dot plot. (A) NAC group versus NAC+RT group. (B) Four different chemotherapy regimen groups.

**A**

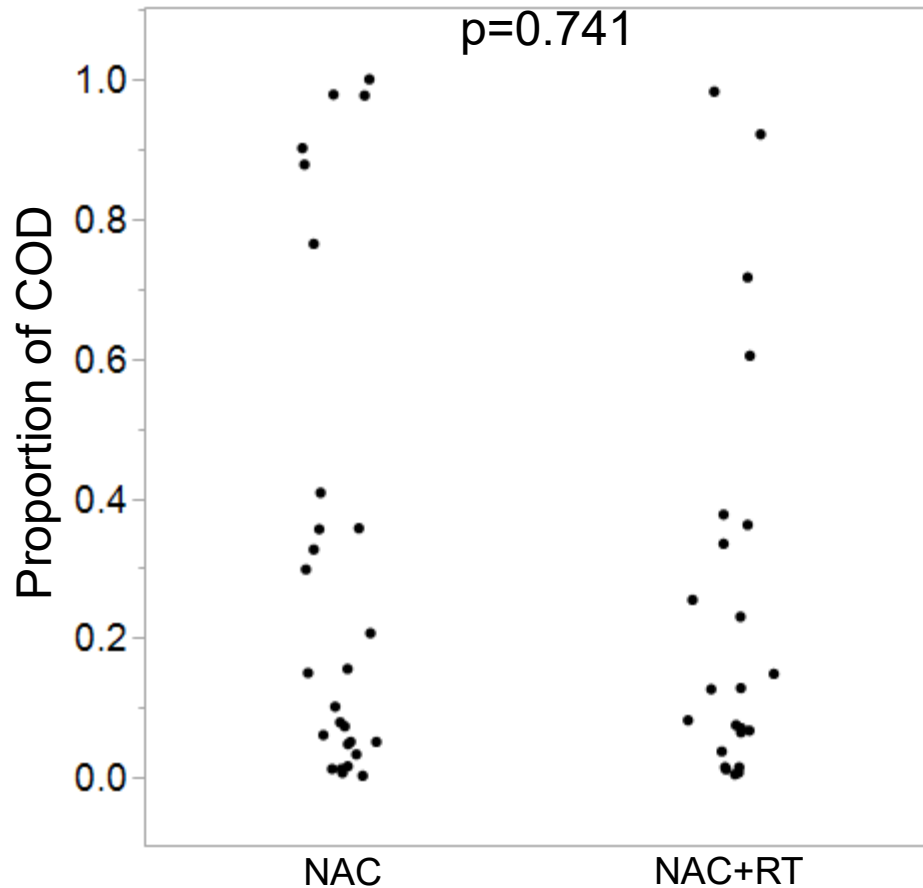

**B**

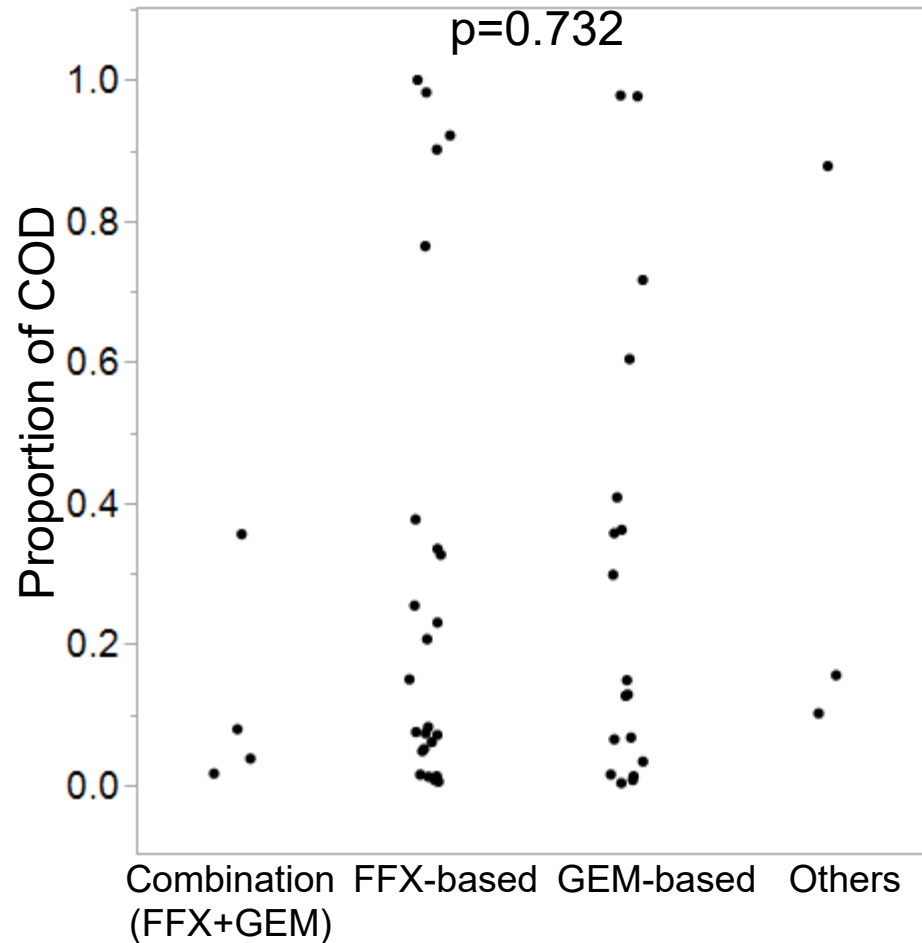

## Supplementary Figure 2.

Proportion of cancer cells which are intraductal. Data are presented as scatter dot plot. pStage0-2 versus pStage3(or 3-4).

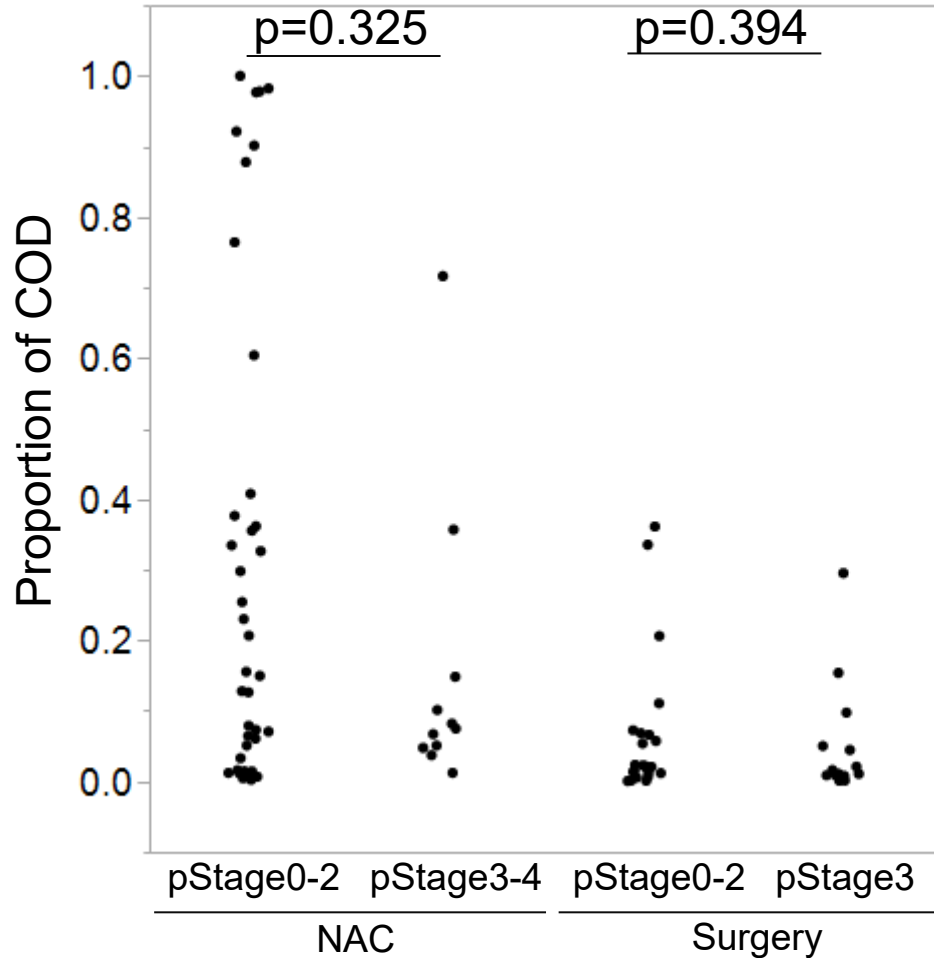

### Supplementary Figure 3.

Proportion of cancer cells which are intraductal. Data are presented as scatter dot plot. Immediate surgery resectable versus NAC resectable versus NAC borderline resectable and locally advanced.

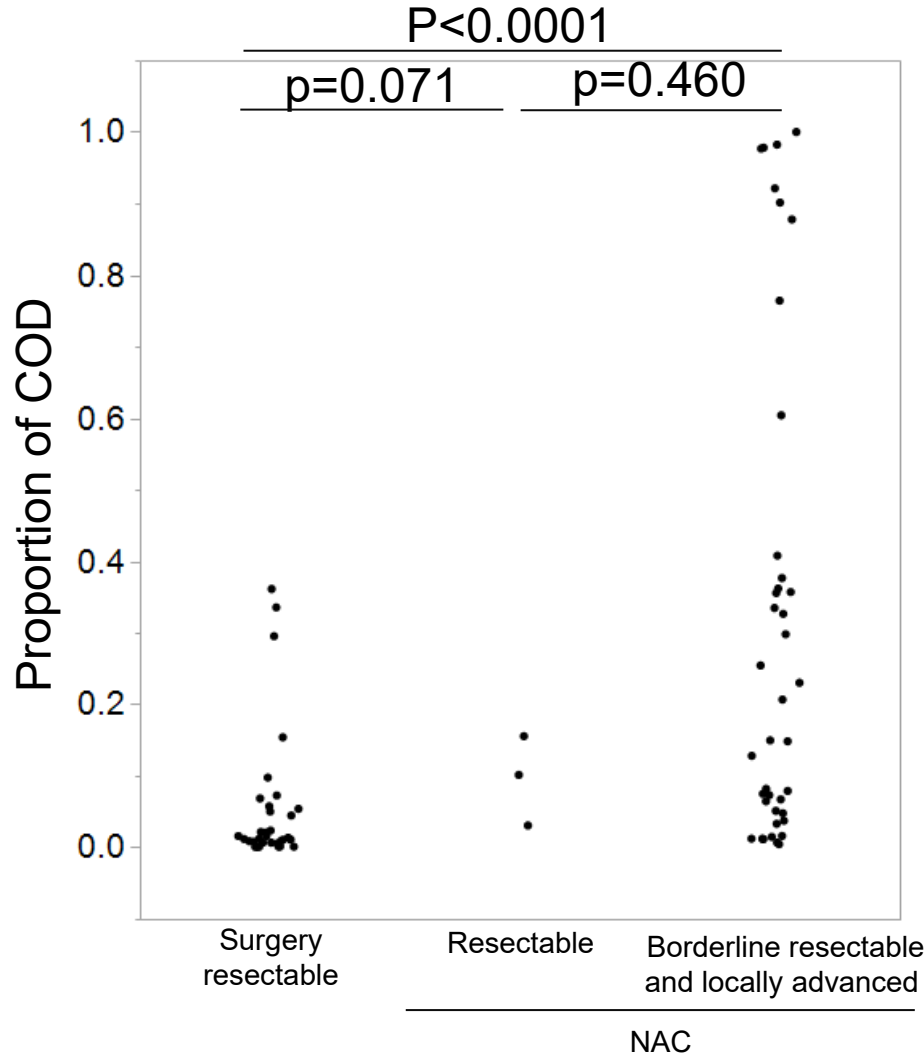

**Supplementary Table 1: The mean proportion of cells in mitosis in intraductal and stromal cancer cells.**

|                               | COD cells | Stromal cancer cells | Paired t-test |
|-------------------------------|-----------|----------------------|---------------|
| NAC cases (n=16)              | 0.42%     | 0.46%                | 0.79          |
| Immediate surgery cases (n=8) | 0.43%     | 0.39%                | 0.64          |
| Total (n=24)                  | 0.42%     | 0.44%                | 0.90          |
